# Supplementary material for: Polyacrylonitrile/noble metal/SiO2nanofibers as substrates for the amplified detection of picomolar amounts of metal ions through plasmon-enhanced fluorescence
Source: Royal Society of Chemistry journal article supplement (doi:10.1039/c4nr05349d), 2014-11-28
Supplement: c4nr05349d1.pdf [file c4nr05349d1.pdf]

## Supporting Information

### Polyacrylonitrile/Noble Metal/SiO<sub>2</sub> Nanofibers as Substrates for the Amplified Detection of Picomolar Metal Ions through Plasmon-Enhanced Fluorescence

Han Zhang, Minhua Cao, Wei, Wu, Haibo Xu, Si Cheng,\* and Li-Juan Fan

Jiangsu Key Laboratory of Advanced Functional Polymer Design and Application, College of Chemistry, Chemical Engineering and Materials Science, Soochow University, Suzhou, Jiangsu, 215123 China.

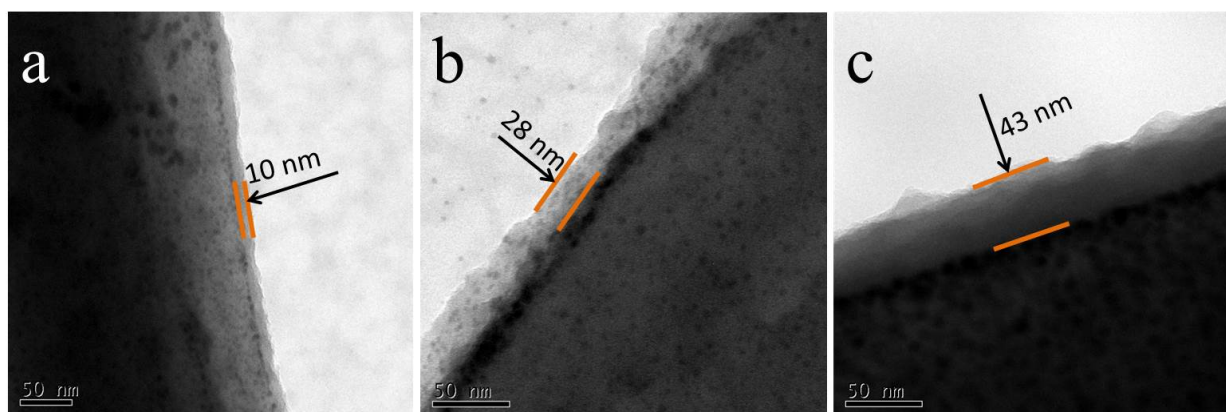

**Figure S1.** TEM images of PAN/Ag/SiO<sub>2</sub> nanofibers with different silica thickness. a) 160 min; b) 400 min; c) 480 min.

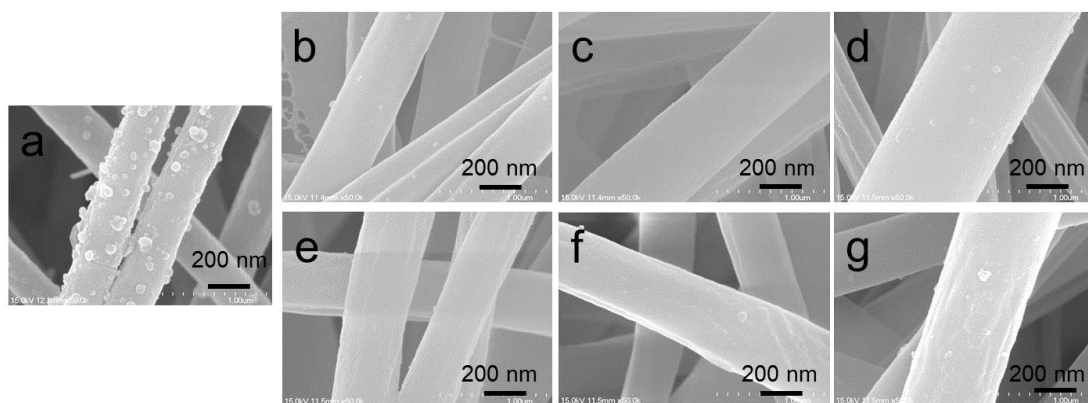

**Figure S2.** SEM images of PAN/Ag and PAN/Ag/SiO<sub>2</sub> nanofibers with different hydrolysis time of TEOS. a) PAN/Ag nanofibers. b) PAN/Ag/SiO<sub>2</sub> nanofibers-80 min. c) PAN/Ag/SiO<sub>2</sub> nanofibers-160 min. d) PAN/Ag/SiO<sub>2</sub> nanofibers-240 min. e) PAN/Ag/SiO<sub>2</sub> nanofibers-320 min. f) PAN/Ag/SiO<sub>2</sub> nanofibers-400 min. g) PAN/Ag/SiO<sub>2</sub> nanofibers-480 min.

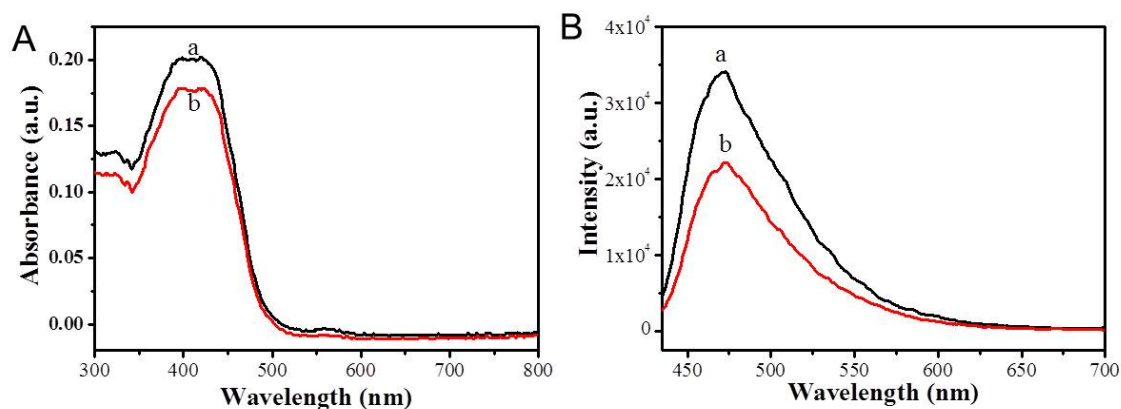

Figure S3. Absorbance (A) and emission (B) spectra of PPESO<sub>3</sub>OR solution. Curve a is the absorption and emission of pure PPESO<sub>3</sub>OR solution without nanofibrous mat, and then PAN/Ag/SiO<sub>2</sub>-320 min nanofibrous mat was fit into the PPESO<sub>3</sub>OR solution. Curve b is the absorption and emission of PPESO<sub>3</sub>OR solution after removing PAN/Ag/SiO<sub>2</sub>-320 min nanofibrous mat. About 35% reduction in fluorescence intensity was observed, indicating that a lot of PPESO<sub>3</sub>OR molecules were absorbed on the surface of nanofibrous mat.

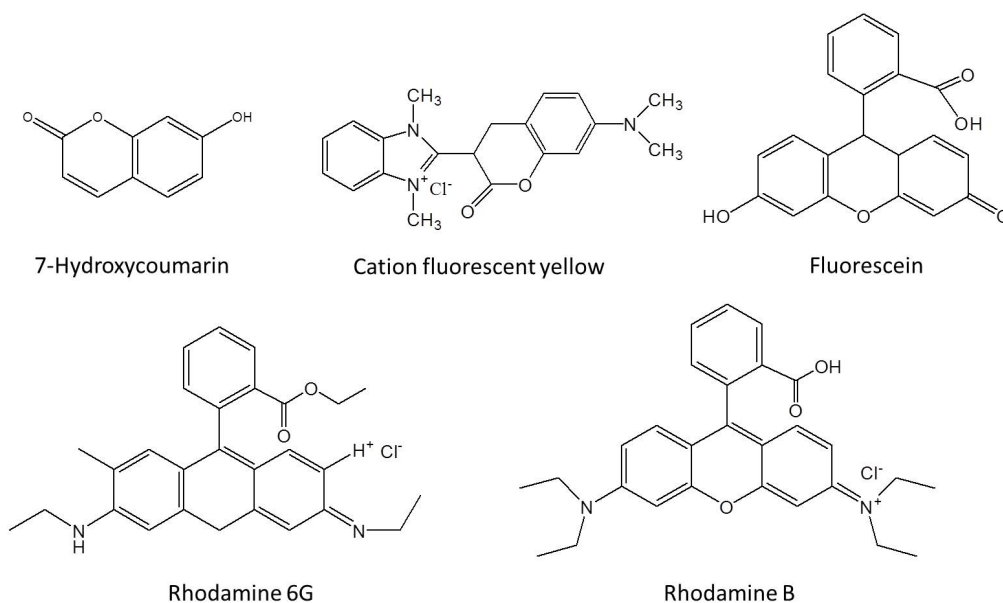

**Figure S4.** Molecule structures of five dyes.

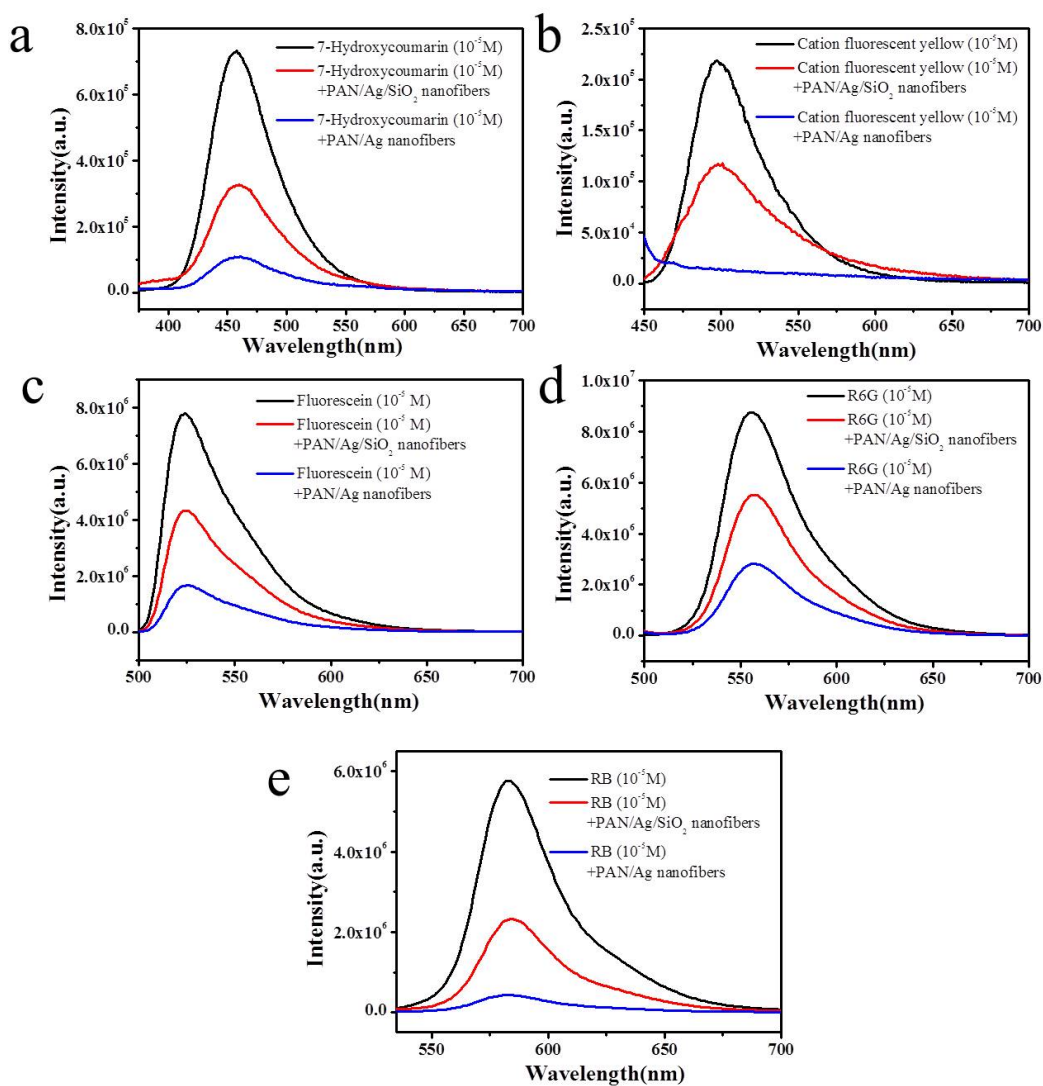

**Figure S5.** Fluorescent emission spectra of five dyes with and without the presence of PAN/Ag and PAN/Ag/SiO<sub>2</sub> nanofibrous mat. The concentration of other five dyes is 10<sup>-5</sup> M. The thickness of silica is about 20 nm.

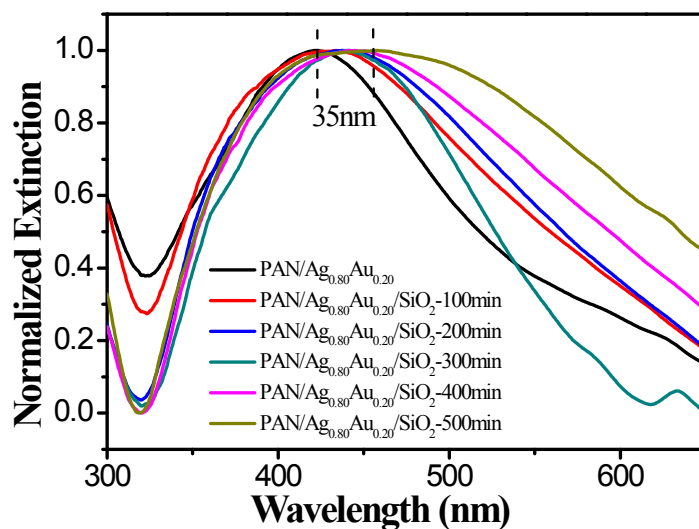

**Figure S6.** Normalized extinction spectra of PAN/Ag<sub>0.8</sub>Au<sub>0.2</sub>/SiO<sub>2</sub> nanofibrous mats.

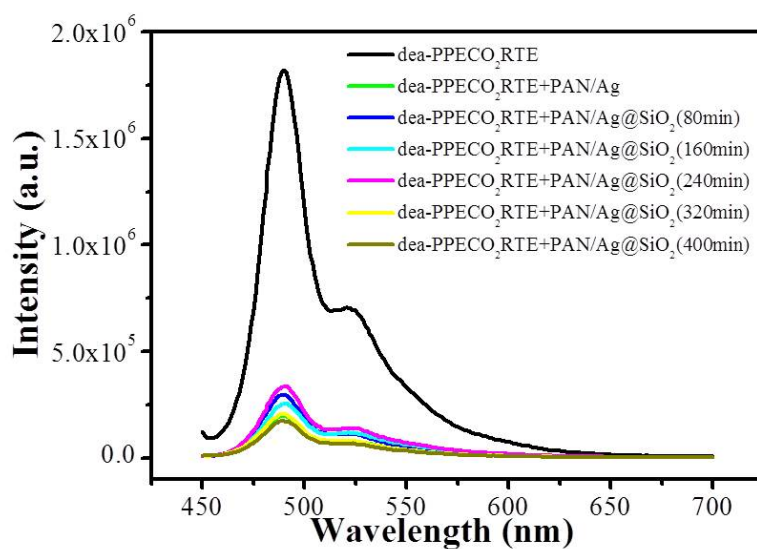

**Figure S7.** Fluorescent emission spectra of dea-PPECO<sub>2</sub>RTE-no Fibers solution and dea-PPECO<sub>2</sub>RTE-Fibers solution.

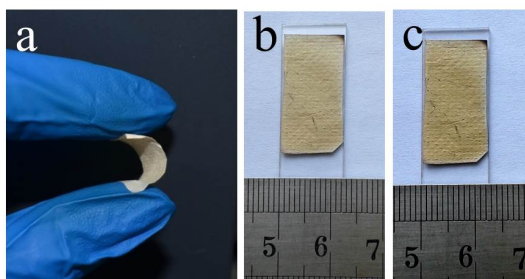

**Figure S8.** The photos of PAN/Ag/SiO<sub>2</sub> nanofibrous mat. a) Flexible PAN/Ag/SiO<sub>2</sub> nanofibrous mat. b) Before 8 cycles. C) After 8 cycles.
